# Supplementary material for: Pan-cancer analysis of Sushi domain-containing protein 4 (SUSD4) and validated in colorectal cancer
Source: publisher site journal article supplement (doi:10.18632/aging.205712), 2024-04-04
Supplement: Supplementary file [file aging-v16i7-205712-supplementary-material-SD1.pdf]

SUPPLEMENTARY FIGURES

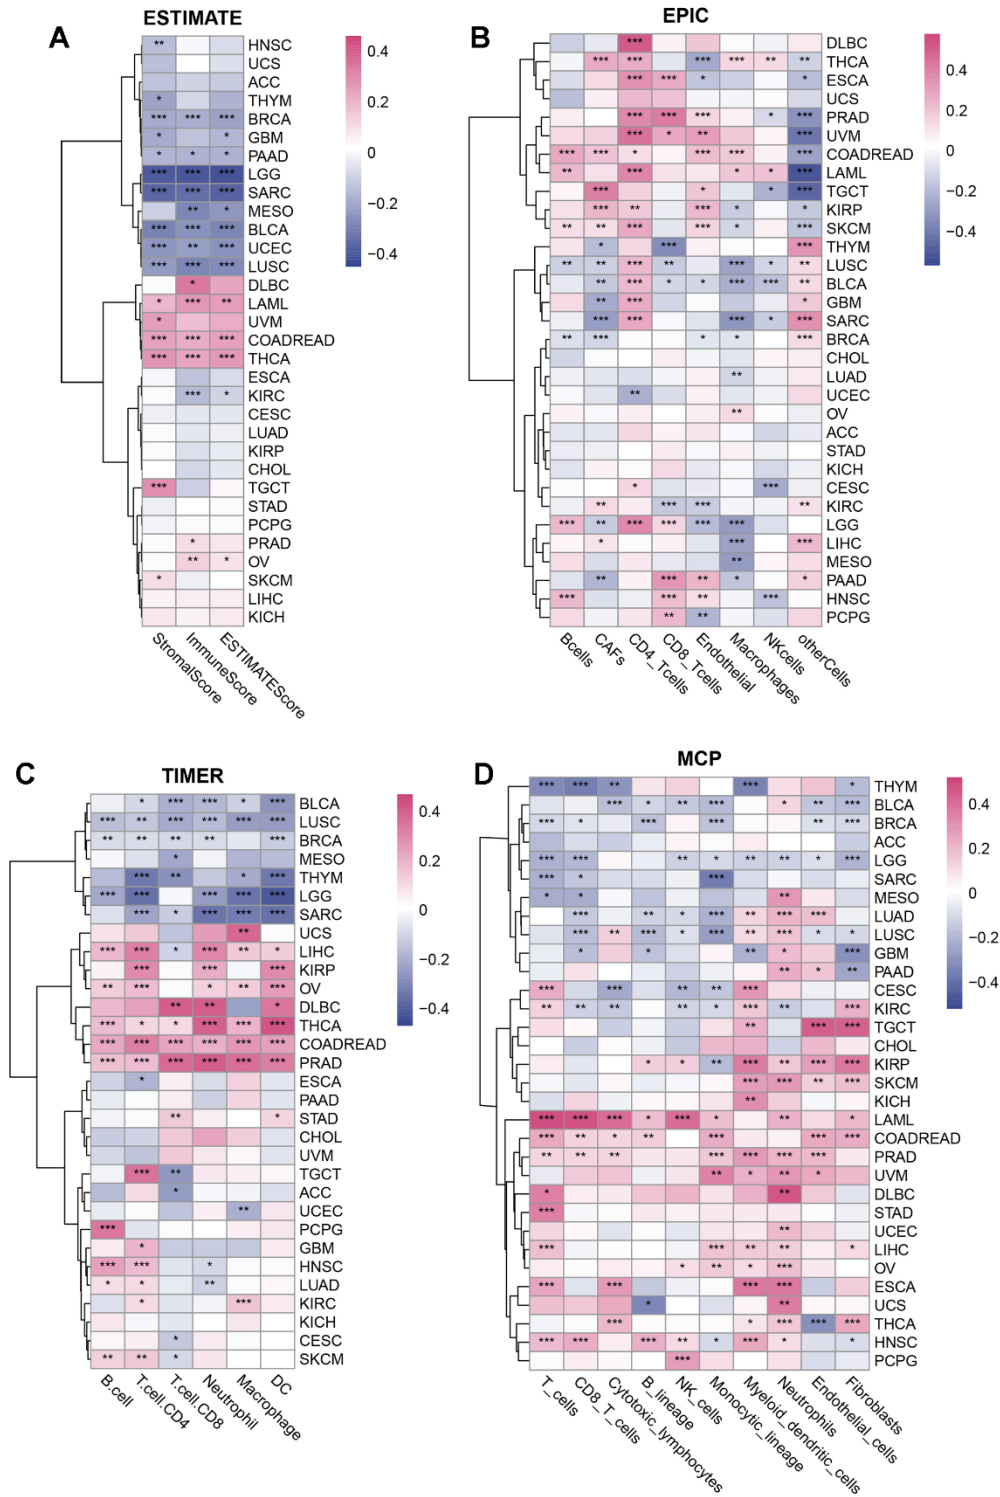

Supplementary Figure 1. The relationship between SUSD4 and immune infiltration. Correlation Analysis Heatmap of SUSD4 with (A) ESTIMATE Score, (B) EPIC Immune Infiltration, (C) Timer Immune Infiltration, and (D) MCP Immune Infiltration.

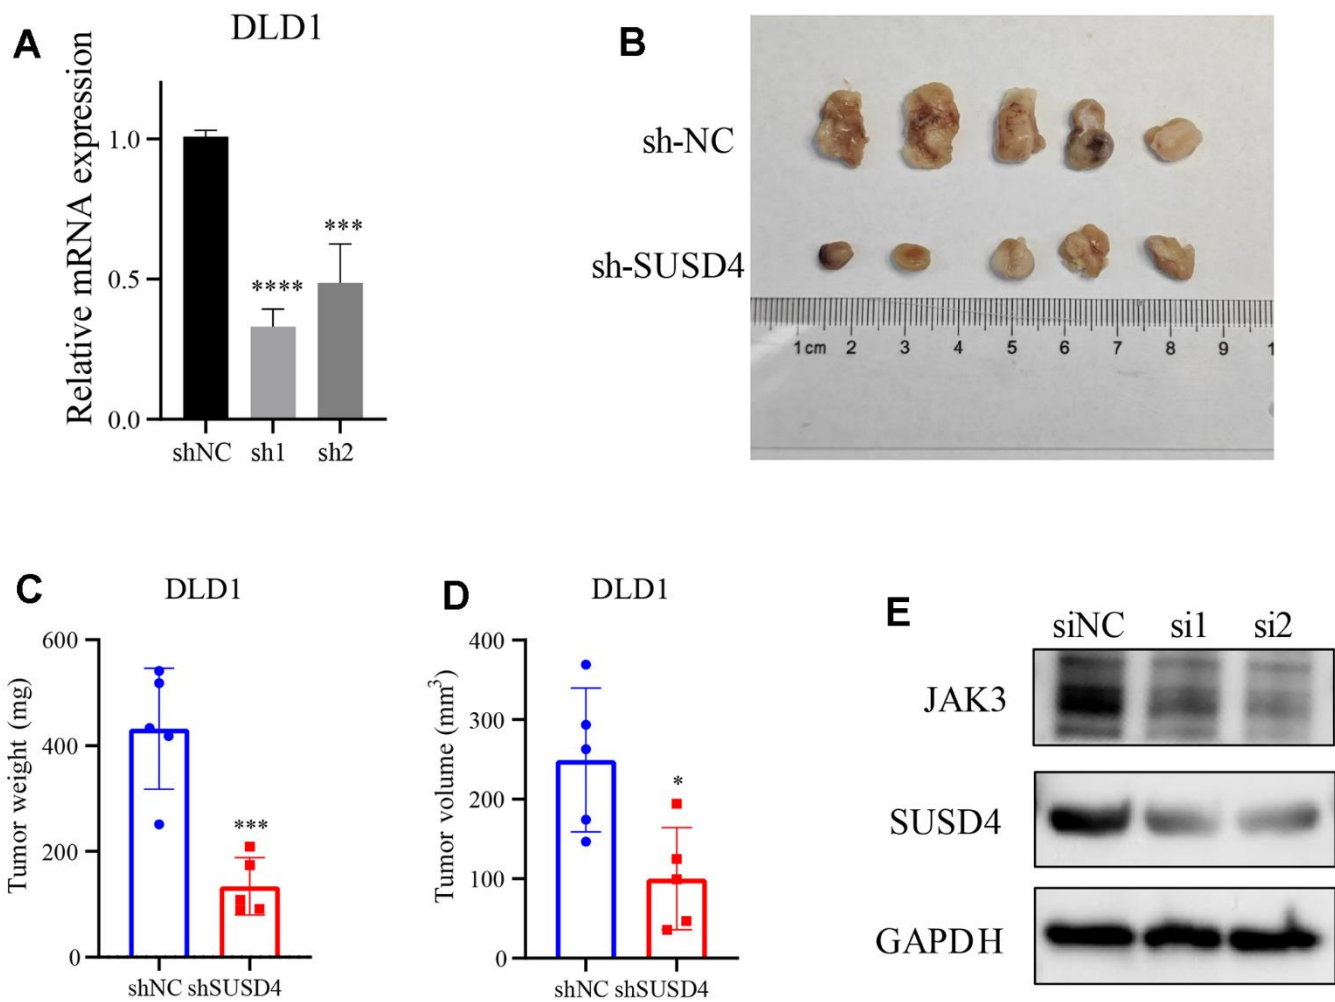

**Supplementary Figure 2.** (A) Confirmation of shRNA knockdown efficiency in DLD1 cells. (B) Representative tumor images of DLD1 cells following shSUSD4 and control group treatments. (C, D) Boxplots illustrating tumor weight (mg) and tumor volume (mm<sup>3</sup>). (E) Western blot analysis depicting the expression levels of JAK3, SUSD4, and GAPDH post siSUSD4 treatment in DLD1 cells. \* $p < 0.05$ , \*\*\* $p < 0.001$ , \*\*\*\* $p < 0.0001$ .
