# Supplementary material for: Pan-cancer analysis of Sushi domain-containing protein 4 (SUSD4) and validated in colorectal cancer
Source: publisher site journal article supplement (doi:10.18632/aging.205712), 2024-04-04
Supplement: Supplementary file [file aging-v16i7-205712-supplementary-material-SD2.pdf]

## SUPPLEMENTARY TABLES

**Supplementary Table 1. Cancer abbreviations.**

| <b>Abbreviations</b> | <b>Cancer name</b>                                               |
|----------------------|------------------------------------------------------------------|
| ACC                  | Adrenocortical carcinoma                                         |
| BLCA                 | Bladder Urothelial Carcinoma                                     |
| BRCA                 | Breast invasive carcinoma                                        |
| CESC                 | Cervical squamous cell carcinoma and endocervical adenocarcinoma |
| CHOL                 | Cholangiocarcinoma                                               |
| COAD                 | Colon adenocarcinoma                                             |
| COADREAD/COREAD      | Colon adenocarcinoma/Rectum adenocarcinoma Esophageal carcinoma  |
| DLBC                 | Lymphoid Neoplasm Diffuse Large B-cell Lymphoma                  |
| ESCA                 | Esophageal carcinoma                                             |
| GBM                  | Glioblastoma multiforme                                          |
| GBMLGG               | Glioma                                                           |
| HNSC                 | Head and Neck squamous cell carcinoma                            |
| KICH                 | Kidney Chromophobe                                               |
| KIPAN                | Pan-kidney cohort (KICH+KIRC+KIRP)                               |
| KIRC                 | Kidney renal clear cell carcinoma                                |
| KIRP                 | Kidney renal papillary cell carcinoma                            |
| LAML                 | Acute Myeloid Leukemia                                           |
| LGG                  | Brain Lower Grade Glioma                                         |
| LIHC                 | Liver hepatocellular carcinoma                                   |
| LUAD                 | Lung adenocarcinoma                                              |
| LUSC                 | Lung squamous cell carcinoma                                     |
| MESO                 | Mesothelioma                                                     |
| OV                   | Ovarian serous cystadenocarcinoma                                |
| PAAD                 | Pancreatic adenocarcinoma                                        |
| PCPG                 | Pheochromocytoma and Paraganglioma                               |
| PRAD                 | Prostate adenocarcinoma                                          |
| READ                 | Rectum adenocarcinoma                                            |
| SARC                 | Sarcoma                                                          |
| STAD                 | Stomach adenocarcinoma                                           |
| SKCM                 | Skin Cutaneous Melanoma                                          |
| STES                 | Stomach and Esophageal carcinoma                                 |
| TGCT                 | Testicular Germ Cell Tumors                                      |
| THCA                 | Thyroid carcinoma                                                |
| THYM                 | Thymoma                                                          |
| UCEC                 | Uterine Corpus Endometrial Carcinoma                             |
| UCS                  | Uterine Carcinosarcoma                                           |
| UVM                  | Uveal Melanoma                                                   |
| OS                   | Osteosarcoma                                                     |
| ALL                  | Acute Lymphoblastic Leukemia                                     |
| NB                   | Neuroblastoma                                                    |
| WT                   | High-Risk Wilms Tumor                                            |

**Supplementary Table 2. Primer information.**

| <b>Gene</b>   | <b>Primer-F</b>           | <b>Primer-R</b>          |
|---------------|---------------------------|--------------------------|
| <b>JAK1</b>   | CTTTGCCCTGTATGACGAGAAC    | ACCTCATCCGGTAGTGGAGC     |
| <b>JAK2</b>   | TCTGGGGAGTATGTTGCAGAA     | AGACATGGTTGGGTGGATACC    |
| <b>JAK3</b>   | CCTGATCGTGGTCCAGAGAG      | GCAGGGATCTTGTGAAAATGTCAT |
| <b>STAT1</b>  | CAGCTTGA CTCAA AATTCCTGGA | TGAAGATTACGCTTGCTTTTCCT  |
| <b>STAT2</b>  | GAGCCAGCAACATGAGATTGA     | GCCTGGATCTTATATCGGAAGCA  |
| <b>STAT3</b>  | CAGCAGCTTGACACACGGTA      | AAACACCAAAGTGGCATGTGA    |
| <b>STAT4</b>  | TGTTGGCCCAATGGATTGAAA     | GGAAACACGACCTAACTGTTTCAT |
| <b>STAT5A</b> | CGACGGGACCTTCTTGTTG       | GTTCCGGGGAGTCAA ACTTCC   |
| <b>STAT5B</b> | GAACACCCGCAATGATTACAGT    | ACGGTCTGACCTCTTAATTCGT   |
| <b>STAT6</b>  | CGAGTAGGGGAGATCCACCTT     | GCAGGAGTTTCTATCAAGCTGTG  |
| <b>SUSD4</b>  | AATGAACCCGAGCAATGGAGA     | GGGCTACAGAGCCTTCAAAGA    |
| <b>GAPDH</b>  | CAGGAGGCATTGCTGATGAT      | GAAGGCTGGGGCTCATT        |
